# Supplementary material
Source: MDPI journal article supplement (https://www.mdpi.com/2079-9276/10/9/89)
Supplement: s1 [file s1]

## Article

# Analysis of the Negative Daily Temperatures Influence on the Failure Rate of the Water Supply Network

Jakub Żywiec Krzysztof Boryczko and Dariusz Kowalski

## Supplementary Materials

**Table S1.** Failure rate values depending on the daily temperature.

| Temperature Range<br>°C | $d_{(t_i;t_i+1>}$<br>Number of Days | $n_{(t_i;t_i+1>}$<br>Number of Failures | $\lambda_{T(t_i;t_i+1>}$<br>Number of Fail./ Day at Given Temp. |
|-------------------------|-------------------------------------|-----------------------------------------|-----------------------------------------------------------------|
| (-11;-10>               | 24                                  | 27                                      | 1,13                                                            |
| (-10;-9>                | 27                                  | 33                                      | 1,22                                                            |
| (-9;-8>                 | 33                                  | 37                                      | 1,12                                                            |
| (-8;-7>                 | 42                                  | 44                                      | 1,05                                                            |
| (-7;-6>                 | 54                                  | 71                                      | 1,31                                                            |
| (-6;-5>                 | 53                                  | 55                                      | 1,04                                                            |
| (-5;-4>                 | 84                                  | 85                                      | 1,01                                                            |
| (-4;-3>                 | 70                                  | 77                                      | 1,10                                                            |
| (-3;-2>                 | 128                                 | 115                                     | 0,90                                                            |
| (-2;-1>                 | 134                                 | 113                                     | 0,84                                                            |
| (-1;0>                  | 168                                 | 169                                     | 1,01                                                            |
| (0;1>                   | 204                                 | 169                                     | 0,83                                                            |
| (1;2>                   | 176                                 | 147                                     | 0,84                                                            |
| (2;3>                   | 208                                 | 163                                     | 0,78                                                            |
| (3;4>                   | 189                                 | 151                                     | 0,80                                                            |
| (4;5>                   | 219                                 | 151                                     | 0,69                                                            |
| (5;6>                   | 187                                 | 140                                     | 0,75                                                            |
| (6;7>                   | 204                                 | 133                                     | 0,65                                                            |
| (7;8>                   | 187                                 | 124                                     | 0,66                                                            |
| (8;9>                   | 177                                 | 104                                     | 0,59                                                            |
| (9;10>                  | 170                                 | 101                                     | 0,59                                                            |
| (10;11>                 | 184                                 | 86                                      | 0,47                                                            |
| (11;12>                 | 210                                 | 123                                     | 0,59                                                            |
| (12;13>                 | 197                                 | 99                                      | 0,50                                                            |
| (13;14>                 | 195                                 | 115                                     | 0,59                                                            |
| (14;15>                 | 213                                 | 129                                     | 0,61                                                            |
| (15;16>                 | 250                                 | 137                                     | 0,55                                                            |
| (16;17>                 | 239                                 | 154                                     | 0,64                                                            |
| (17;18>                 | 211                                 | 115                                     | 0,55                                                            |
| (18;19>                 | 219                                 | 140                                     | 0,64                                                            |
| (19;20>                 | 190                                 | 120                                     | 0,63                                                            |
| (20;21>                 | 164                                 | 94                                      | 0,57                                                            |
| (21;22>                 | 134                                 | 95                                      | 0,71                                                            |
| (22;23>                 | 94                                  | 44                                      | 0,47                                                            |
| (23;24>                 | 82                                  | 60                                      | 0,73                                                            |
| (24;25>                 | 39                                  | 34                                      | 0,87                                                            |
| (25;26>                 | 41                                  | 27                                      | 0,66                                                            |

**Table S2.** Failure rate values depending on the daily temperature and pipes material.

| Temperature Range<br>°C | $d_{(t_i; t_i+1>}$<br>Number of Days | $nM_{(t_i; t_i+1>}$<br>Pipe Material |     |    |     |    | $\lambda M_{(t_i; t_i+1>}$<br>Pipe Material |        |        |        |        |
|-------------------------|--------------------------------------|--------------------------------------|-----|----|-----|----|---------------------------------------------|--------|--------|--------|--------|
|                         |                                      | ST                                   | CI  | PE | PVC | AC | ST                                          | CI     | PE     | PVC    | AC     |
|                         |                                      | Num. of Failures                     |     |    |     |    | Num. of Failures/ km · Day at Given Temp.   |        |        |        |        |
| (−11;−10>               | 24                                   | 8                                    | 16  | 2  | 1   | 0  | 0,0014                                      | 0,0060 | 0,0002 | 0,0002 | 0,0000 |
| (−10;−9>                | 27                                   | 10                                   | 18  | 5  | 0   | 0  | 0,0015                                      | 0,0060 | 0,0005 | 0,0000 | 0,0000 |
| (−9;−8>                 | 33                                   | 11                                   | 23  | 3  | 0   | 0  | 0,0014                                      | 0,0063 | 0,0002 | 0,0000 | 0,0000 |
| (−8;−7>                 | 42                                   | 14                                   | 23  | 3  | 3   | 1  | 0,0014                                      | 0,0049 | 0,0002 | 0,0003 | 0,0079 |
| (−7;−6>                 | 54                                   | 20                                   | 40  | 9  | 2   | 0  | 0,0015                                      | 0,0067 | 0,0004 | 0,0001 | 0,0000 |
| (−6;−5>                 | 53                                   | 17                                   | 33  | 5  | 0   | 0  | 0,0013                                      | 0,0056 | 0,0002 | 0,0000 | 0,0000 |
| (−5;−4>                 | 84                                   | 27                                   | 46  | 8  | 3   | 1  | 0,0013                                      | 0,0049 | 0,0002 | 0,0001 | 0,0040 |
| (−4;−3>                 | 70                                   | 23                                   | 48  | 3  | 3   | 0  | 0,0013                                      | 0,0062 | 0,0001 | 0,0002 | 0,0000 |
| (−3;−2>                 | 128                                  | 34                                   | 68  | 10 | 3   | 0  | 0,0011                                      | 0,0048 | 0,0002 | 0,0001 | 0,0000 |
| (−2;−1>                 | 134                                  | 40                                   | 56  | 10 | 6   | 1  | 0,0012                                      | 0,0038 | 0,0002 | 0,0002 | 0,0025 |
| (−1;0>                  | 168                                  | 46                                   | 103 | 10 | 9   | 1  | 0,0011                                      | 0,0055 | 0,0001 | 0,0002 | 0,0020 |
| (0;1>                   | 204                                  | 60                                   | 90  | 14 | 5   | 0  | 0,0012                                      | 0,0040 | 0,0002 | 0,0001 | 0,0000 |
| (1;2>                   | 176                                  | 48                                   | 84  | 6  | 8   | 1  | 0,0011                                      | 0,0043 | 0,0001 | 0,0002 | 0,0019 |
| (2;3>                   | 208                                  | 59                                   | 81  | 9  | 11  | 3  | 0,0012                                      | 0,0035 | 0,0001 | 0,0002 | 0,0048 |
| (3;4>                   | 189                                  | 56                                   | 74  | 11 | 9   | 1  | 0,0012                                      | 0,0035 | 0,0001 | 0,0002 | 0,0018 |
| (4;5>                   | 219                                  | 59                                   | 71  | 11 | 9   | 1  | 0,0011                                      | 0,0029 | 0,0001 | 0,0002 | 0,0015 |
| (5;6>                   | 187                                  | 54                                   | 70  | 11 | 5   | 0  | 0,0012                                      | 0,0034 | 0,0001 | 0,0001 | 0,0000 |
| (6;7>                   | 204                                  | 59                                   | 58  | 11 | 5   | 0  | 0,0012                                      | 0,0026 | 0,0001 | 0,0001 | 0,0000 |
| (7;8>                   | 187                                  | 50                                   | 55  | 10 | 8   | 1  | 0,0011                                      | 0,0026 | 0,0001 | 0,0002 | 0,0018 |
| (8;9>                   | 177                                  | 47                                   | 43  | 6  | 8   | 0  | 0,0011                                      | 0,0022 | 0,0001 | 0,0002 | 0,0000 |
| (9;10>                  | 170                                  | 41                                   | 44  | 7  | 9   | 0  | 0,0010                                      | 0,0023 | 0,0001 | 0,0002 | 0,0000 |
| (10;11>                 | 184                                  | 43                                   | 31  | 4  | 8   | 0  | 0,0010                                      | 0,0015 | 0,0001 | 0,0002 | 0,0000 |
| (11;12>                 | 210                                  | 50                                   | 55  | 11 | 6   | 1  | 0,0010                                      | 0,0024 | 0,0001 | 0,0001 | 0,0016 |
| (12;13>                 | 197                                  | 46                                   | 35  | 10 | 6   | 2  | 0,0010                                      | 0,0016 | 0,0001 | 0,0001 | 0,0034 |
| (13;14>                 | 195                                  | 58                                   | 33  | 12 | 10  | 2  | 0,0012                                      | 0,0015 | 0,0002 | 0,0002 | 0,0034 |
| (14;15>                 | 213                                  | 73                                   | 34  | 17 | 4   | 1  | 0,0014                                      | 0,0014 | 0,0002 | 0,0001 | 0,0016 |
| (15;16>                 | 250                                  | 76                                   | 34  | 19 | 7   | 1  | 0,0012                                      | 0,0012 | 0,0002 | 0,0001 | 0,0013 |
| (16;17>                 | 239                                  | 86                                   | 39  | 13 | 15  | 1  | 0,0015                                      | 0,0015 | 0,0001 | 0,0002 | 0,0014 |
| (17;18>                 | 211                                  | 59                                   | 37  | 8  | 8   | 3  | 0,0011                                      | 0,0016 | 0,0001 | 0,0001 | 0,0047 |
| (18;19>                 | 219                                  | 85                                   | 37  | 10 | 7   | 1  | 0,0016                                      | 0,0015 | 0,0001 | 0,0001 | 0,0015 |
| (19;20>                 | 190                                  | 66                                   | 27  | 11 | 13  | 3  | 0,0014                                      | 0,0013 | 0,0001 | 0,0003 | 0,0053 |
| (20;21>                 | 164                                  | 67                                   | 15  | 6  | 6   | 0  | 0,0017                                      | 0,0008 | 0,0001 | 0,0001 | 0,0000 |
| (21;22>                 | 134                                  | 51                                   | 25  | 12 | 7   | 0  | 0,0016                                      | 0,0017 | 0,0002 | 0,0002 | 0,0000 |
| (22;23>                 | 94                                   | 27                                   | 9   | 4  | 3   | 1  | 0,0012                                      | 0,0009 | 0,0001 | 0,0001 | 0,0035 |
| (23;24>                 | 82                                   | 35                                   | 16  | 4  | 5   | 0  | 0,0017                                      | 0,0018 | 0,0001 | 0,0002 | 0,0000 |
| (24;25>                 | 39                                   | 25                                   | 7   | 0  | 2   | 0  | 0,0026                                      | 0,0016 | 0,0000 | 0,0002 | 0,0000 |
| (25;26>                 | 41                                   | 14                                   | 8   | 2  | 2   | 1  | 0,0014                                      | 0,0018 | 0,0001 | 0,0002 | 0,0081 |
| Mean:                   |                                      |                                      |     |    |     |    | 0,0013                                      | 0,0031 | 0,0002 | 0,0001 | 0,0017 |

**Table S3.** Failure rate values depending on the daily temperature and the cause of the failure.

| Temperature Range | $d_{(t_i; t_i+1)}$ | $n_{C(t_i; t_i+1)}$ |           |          |       | $\lambda_{C(t_i; t_i+1)}$            |           |          |       |
|-------------------|--------------------|---------------------|-----------|----------|-------|--------------------------------------|-----------|----------|-------|
|                   |                    | Failure Cause       |           |          |       | Failure Cause                        |           |          |       |
|                   |                    | Corrosion           | Unsealing | Breakage | Crack | Corrosion                            | Unsealing | Breakage | Crack |
| °C                | Number of Days     | Num. of Failures    |           |          |       | Num. of Failures/ Day at Given Temp. |           |          |       |
| (-11;-10>         | 24                 | 10                  | 8         | 5        | 4     | 0,42                                 | 0,33      | 0,21     | 0,17  |
| (-10;-9>          | 27                 | 12                  | 15        | 6        | 0     | 0,44                                 | 0,56      | 0,22     | 0,00  |
| (-9;-8>           | 33                 | 14                  | 14        | 7        | 2     | 0,42                                 | 0,42      | 0,21     | 0,06  |
| (-8;-7>           | 42                 | 15                  | 21        | 4        | 4     | 0,36                                 | 0,50      | 0,10     | 0,10  |
| (-7;-6>           | 54                 | 24                  | 33        | 13       | 1     | 0,44                                 | 0,61      | 0,24     | 0,02  |
| (-6;-5>           | 53                 | 21                  | 22        | 10       | 2     | 0,40                                 | 0,42      | 0,19     | 0,04  |
| (-5;-4>           | 84                 | 32                  | 35        | 16       | 2     | 0,38                                 | 0,42      | 0,19     | 0,02  |
| (-4;-3>           | 70                 | 26                  | 26        | 21       | 4     | 0,37                                 | 0,37      | 0,30     | 0,06  |
| (-3;-2>           | 128                | 40                  | 56        | 13       | 6     | 0,31                                 | 0,44      | 0,10     | 0,05  |
| (-2;-1>           | 134                | 46                  | 43        | 15       | 9     | 0,34                                 | 0,32      | 0,11     | 0,07  |
| (-1;0>            | 168                | 57                  | 75        | 33       | 4     | 0,34                                 | 0,45      | 0,20     | 0,02  |
| (0;1>             | 204                | 68                  | 73        | 26       | 2     | 0,33                                 | 0,36      | 0,13     | 0,01  |
| (1;2>             | 176                | 54                  | 60        | 22       | 11    | 0,31                                 | 0,34      | 0,13     | 0,06  |
| (2;3>             | 208                | 65                  | 58        | 29       | 11    | 0,31                                 | 0,28      | 0,14     | 0,05  |
| (3;4>             | 189                | 60                  | 58        | 24       | 9     | 0,32                                 | 0,31      | 0,13     | 0,05  |
| (4;5>             | 219                | 68                  | 56        | 16       | 11    | 0,31                                 | 0,26      | 0,07     | 0,05  |
| (5;6>             | 187                | 60                  | 61        | 13       | 6     | 0,32                                 | 0,33      | 0,07     | 0,03  |
| (6;7>             | 204                | 65                  | 52        | 10       | 6     | 0,32                                 | 0,25      | 0,05     | 0,03  |
| (7;8>             | 187                | 56                  | 52        | 11       | 5     | 0,30                                 | 0,28      | 0,06     | 0,03  |
| (8;9>             | 177                | 53                  | 35        | 8        | 8     | 0,30                                 | 0,20      | 0,05     | 0,05  |
| (9;10>            | 170                | 44                  | 38        | 13       | 6     | 0,26                                 | 0,22      | 0,08     | 0,04  |
| (10;11>           | 184                | 46                  | 26        | 6        | 8     | 0,25                                 | 0,14      | 0,03     | 0,04  |
| (11;12>           | 210                | 53                  | 54        | 8        | 8     | 0,25                                 | 0,26      | 0,04     | 0,04  |
| (12;13>           | 197                | 49                  | 36        | 6        | 8     | 0,25                                 | 0,18      | 0,03     | 0,04  |
| (13;14>           | 195                | 63                  | 35        | 9        | 8     | 0,32                                 | 0,18      | 0,05     | 0,04  |
| (14;15>           | 213                | 77                  | 33        | 9        | 10    | 0,36                                 | 0,15      | 0,04     | 0,05  |
| (15;16>           | 250                | 82                  | 38        | 6        | 11    | 0,33                                 | 0,15      | 0,02     | 0,04  |
| (16;17>           | 239                | 98                  | 31        | 14       | 11    | 0,41                                 | 0,13      | 0,06     | 0,05  |
| (17;18>           | 211                | 65                  | 35        | 6        | 9     | 0,31                                 | 0,17      | 0,03     | 0,04  |
| (18;19>           | 219                | 93                  | 28        | 11       | 8     | 0,42                                 | 0,13      | 0,05     | 0,04  |
| (19;20>           | 190                | 72                  | 24        | 8        | 16    | 0,38                                 | 0,13      | 0,04     | 0,08  |
| (20;21>           | 164                | 71                  | 15        | 1        | 7     | 0,43                                 | 0,09      | 0,01     | 0,04  |
| (21;22>           | 134                | 59                  | 25        | 4        | 7     | 0,44                                 | 0,19      | 0,03     | 0,05  |
| (22;23>           | 94                 | 30                  | 11        | 1        | 2     | 0,32                                 | 0,12      | 0,01     | 0,02  |
| (23;24>           | 82                 | 37                  | 17        | 3        | 3     | 0,45                                 | 0,21      | 0,04     | 0,04  |
| (24;25>           | 39                 | 27                  | 3         | 2        | 2     | 0,69                                 | 0,08      | 0,05     | 0,05  |
| (25;26>           | 41                 | 15                  | 5         | 5        | 2     | 0,37                                 | 0,12      | 0,12     | 0,05  |
| Mean:             |                    |                     |           |          |       | 0,36                                 | 0,27      | 0,10     | 0,05  |

**Table S4.** Failure rate values depending on the daily temperature and the pipe diameter for water supply connections (25mm – 80mm).

| Temperature Range | $d_{(t_i; t_i+1)}$ | $nD(t_i; t_i+1)$  |    |    |    |    |    | $\lambda D(t_i; t_i+1)$                  |        |        |        |        |        |
|-------------------|--------------------|-------------------|----|----|----|----|----|------------------------------------------|--------|--------|--------|--------|--------|
|                   |                    | Pipe Diameter, mm |    |    |    |    |    | Pipe Diameter, mm                        |        |        |        |        |        |
|                   |                    | 25                | 32 | 40 | 50 | 65 | 80 | 25                                       | 32     | 40     | 50     | 65     | 80     |
| °C                | Number of Days     | Num. of Failures  |    |    |    |    |    | Num. of Failures/km · Day at Given Temp. |        |        |        |        |        |
| (-11;-10>         | 24                 | 1                 | 4  | 0  | 4  | 1  | 4  | 0,0007                                   | 0,0027 | 0,0000 | 0,0027 | 0,0007 | 0,0027 |
| (-10;-9>          | 27                 | 0                 | 2  | 2  | 2  | 2  | 8  | 0,0000                                   | 0,0012 | 0,0012 | 0,0012 | 0,0012 | 0,0049 |
| (-9;-8>           | 33                 | 2                 | 2  | 1  | 5  | 0  | 1  | 0,0010                                   | 0,0010 | 0,0005 | 0,0025 | 0,0000 | 0,0005 |
| (-8;-7>           | 42                 | 2                 | 3  | 1  | 6  | 1  | 5  | 0,0008                                   | 0,0012 | 0,0004 | 0,0023 | 0,0004 | 0,0020 |
| (-7;-6>           | 54                 | 3                 | 7  | 4  | 5  | 1  | 7  | 0,0009                                   | 0,0021 | 0,0012 | 0,0015 | 0,0003 | 0,0021 |
| (-6;-5>           | 53                 | 3                 | 5  | 3  | 7  | 0  | 5  | 0,0009                                   | 0,0016 | 0,0009 | 0,0022 | 0,0000 | 0,0016 |
| (-5;-4>           | 84                 | 1                 | 2  | 5  | 10 | 3  | 14 | 0,0002                                   | 0,0004 | 0,0010 | 0,0020 | 0,0006 | 0,0027 |
| (-4;-3>           | 70                 | 7                 | 4  | 2  | 7  | 2  | 12 | 0,0016                                   | 0,0009 | 0,0005 | 0,0016 | 0,0005 | 0,0028 |
| (-3;-2>           | 128                | 9                 | 9  | 8  | 5  | 1  | 11 | 0,0012                                   | 0,0012 | 0,0010 | 0,0006 | 0,0001 | 0,0014 |
| (-2;-1>           | 134                | 8                 | 10 | 6  | 11 | 3  | 17 | 0,0010                                   | 0,0012 | 0,0007 | 0,0014 | 0,0004 | 0,0021 |
| (-1;0>            | 168                | 1                 | 20 | 10 | 12 | 4  | 28 | 0,0001                                   | 0,0020 | 0,0010 | 0,0012 | 0,0004 | 0,0027 |
| (0;1>             | 204                | 5                 | 13 | 14 | 16 | 5  | 25 | 0,0004                                   | 0,0010 | 0,0011 | 0,0013 | 0,0004 | 0,0020 |
| (1;2>             | 176                | 8                 | 14 | 7  | 9  | 0  | 25 | 0,0007                                   | 0,0013 | 0,0007 | 0,0008 | 0,0000 | 0,0023 |
| (2;3>             | 208                | 7                 | 24 | 8  | 15 | 1  | 18 | 0,0006                                   | 0,0019 | 0,0006 | 0,0012 | 0,0001 | 0,0014 |
| (3;4>             | 189                | 5                 | 15 | 7  | 13 | 5  | 15 | 0,0004                                   | 0,0013 | 0,0006 | 0,0011 | 0,0004 | 0,0013 |
| (4;5>             | 219                | 7                 | 11 | 12 | 14 | 3  | 23 | 0,0005                                   | 0,0008 | 0,0009 | 0,0011 | 0,0002 | 0,0017 |
| (5;6>             | 187                | 7                 | 18 | 7  | 15 | 2  | 20 | 0,0006                                   | 0,0016 | 0,0006 | 0,0013 | 0,0002 | 0,0018 |
| (6;7>             | 204                | 11                | 19 | 11 | 9  | 6  | 9  | 0,0009                                   | 0,0015 | 0,0009 | 0,0007 | 0,0005 | 0,0007 |
| (7;8>             | 187                | 10                | 18 | 5  | 17 | 4  | 16 | 0,0009                                   | 0,0016 | 0,0004 | 0,0015 | 0,0004 | 0,0014 |
| (8;9>             | 177                | 5                 | 15 | 9  | 10 | 1  | 15 | 0,0005                                   | 0,0014 | 0,0008 | 0,0009 | 0,0001 | 0,0014 |
| (9;10>            | 170                | 4                 | 15 | 8  | 15 | 2  | 12 | 0,0004                                   | 0,0015 | 0,0008 | 0,0015 | 0,0002 | 0,0012 |
| (10;11>           | 184                | 14                | 8  | 7  | 13 | 2  | 7  | 0,0013                                   | 0,0007 | 0,0006 | 0,0012 | 0,0002 | 0,0006 |
| (11;12>           | 210                | 8                 | 20 | 5  | 18 | 4  | 10 | 0,0006                                   | 0,0016 | 0,0004 | 0,0014 | 0,0003 | 0,0008 |
| (12;13>           | 197                | 8                 | 10 | 12 | 11 | 1  | 14 | 0,0007                                   | 0,0008 | 0,0010 | 0,0009 | 0,0001 | 0,0012 |
| (13;14>           | 195                | 10                | 23 | 13 | 14 | 2  | 6  | 0,0008                                   | 0,0019 | 0,0011 | 0,0012 | 0,0002 | 0,0005 |
| (14;15>           | 213                | 12                | 16 | 14 | 18 | 4  | 14 | 0,0009                                   | 0,0012 | 0,0011 | 0,0014 | 0,0003 | 0,0011 |
| (15;16>           | 250                | 23                | 15 | 13 | 14 | 4  | 16 | 0,0015                                   | 0,0010 | 0,0009 | 0,0009 | 0,0003 | 0,0011 |
| (16;17>           | 239                | 18                | 15 | 13 | 24 | 4  | 22 | 0,0012                                   | 0,0010 | 0,0009 | 0,0017 | 0,0003 | 0,0015 |
| (17;18>           | 211                | 8                 | 15 | 8  | 13 | 5  | 20 | 0,0006                                   | 0,0012 | 0,0006 | 0,0010 | 0,0004 | 0,0016 |
| (18;19>           | 219                | 12                | 26 | 14 | 14 | 5  | 14 | 0,0009                                   | 0,0020 | 0,0011 | 0,0011 | 0,0004 | 0,0011 |
| (19;20>           | 190                | 11                | 16 | 17 | 19 | 1  | 11 | 0,0010                                   | 0,0014 | 0,0015 | 0,0016 | 0,0001 | 0,0010 |
| (20;21>           | 164                | 8                 | 17 | 11 | 15 | 1  | 7  | 0,0008                                   | 0,0017 | 0,0011 | 0,0015 | 0,0001 | 0,0007 |
| (21;22>           | 134                | 6                 | 17 | 9  | 18 | 5  | 11 | 0,0007                                   | 0,0021 | 0,0011 | 0,0022 | 0,0006 | 0,0014 |
| (22;23>           | 94                 | 6                 | 11 | 2  | 10 | 2  | 1  | 0,0010                                   | 0,0019 | 0,0003 | 0,0017 | 0,0003 | 0,0002 |
| (23;24>           | 82                 | 3                 | 9  | 2  | 12 | 1  | 5  | 0,0006                                   | 0,0018 | 0,0004 | 0,0024 | 0,0002 | 0,0010 |
| (24;25>           | 39                 | 5                 | 6  | 0  | 9  | 0  | 3  | 0,0021                                   | 0,0025 | 0,0000 | 0,0038 | 0,0000 | 0,0013 |
| (25;26>           | 41                 | 3                 | 1  | 1  | 3  | 2  | 5  | 0,0012                                   | 0,0004 | 0,0004 | 0,0012 | 0,0008 | 0,0020 |
| Mean:             |                    |                   |    |    |    |    |    | 0,0008                                   | 0,0014 | 0,0008 | 0,0015 | 0,0003 | 0,0016 |

**Table S5.** Failure rate values depending on the daily temperature and the pipe diameter for the distribution network (100mm – 250mm).

| Temperature Range | $d_{(t_i; t_{i+1})}$ | $nD_{(t_i; t_{i+1})}$ |     |     |     | $\lambda D_{(t_i; t_{i+1})}$             |        |        |        |
|-------------------|----------------------|-----------------------|-----|-----|-----|------------------------------------------|--------|--------|--------|
|                   |                      | Pipe Diameter, mm     |     |     |     | Pipe Diameter, mm                        |        |        |        |
|                   |                      | 100                   | 150 | 200 | 250 | 100                                      | 150    | 200    | 250    |
| °C                | Number of Days       | Num. of Failures      |     |     |     | Num. of Failures/km • Day at Given Temp. |        |        |        |
| (-11;-10>         | 24                   | 5                     | 5   | 2   | 0   | 0,0014                                   | 0,0014 | 0,0006 | 0,0000 |
| (-10;-9>          | 27                   | 3                     | 7   | 3   | 1   | 0,0007                                   | 0,0017 | 0,0007 | 0,0002 |
| (-9;-8>           | 33                   | 12                    | 7   | 0   | 1   | 0,0024                                   | 0,0014 | 0,0000 | 0,0002 |
| (-8;-7>           | 42                   | 6                     | 6   | 2   | 1   | 0,0009                                   | 0,0009 | 0,0003 | 0,0002 |
| (-7;-6>           | 54                   | 14                    | 17  | 4   | 3   | 0,0017                                   | 0,0021 | 0,0005 | 0,0004 |
| (-6;-5>           | 53                   | 11                    | 7   | 3   | 2   | 0,0014                                   | 0,0009 | 0,0004 | 0,0002 |
| (-5;-4>           | 84                   | 16                    | 18  | 3   | 2   | 0,0013                                   | 0,0014 | 0,0002 | 0,0002 |
| (-4;-3>           | 70                   | 15                    | 12  | 2   | 3   | 0,0014                                   | 0,0011 | 0,0002 | 0,0003 |
| (-3;-2>           | 128                  | 26                    | 22  | 1   | 6   | 0,0013                                   | 0,0011 | 0,0001 | 0,0003 |
| (-2;-1>           | 134                  | 20                    | 24  | 1   | 0   | 0,0010                                   | 0,0012 | 0,0000 | 0,0000 |
| (-1;0>            | 168                  | 24                    | 32  | 6   | 8   | 0,0009                                   | 0,0013 | 0,0002 | 0,0003 |
| (0;1>             | 204                  | 38                    | 24  | 3   | 8   | 0,0012                                   | 0,0008 | 0,0001 | 0,0003 |
| (1;2>             | 176                  | 33                    | 20  | 3   | 3   | 0,0012                                   | 0,0008 | 0,0001 | 0,0001 |
| (2;3>             | 208                  | 36                    | 21  | 8   | 7   | 0,0011                                   | 0,0007 | 0,0003 | 0,0002 |
| (3;4>             | 189                  | 32                    | 19  | 4   | 14  | 0,0011                                   | 0,0007 | 0,0001 | 0,0005 |
| (4;5>             | 219                  | 28                    | 25  | 1   | 3   | 0,0008                                   | 0,0008 | 0,0000 | 0,0001 |
| (5;6>             | 187                  | 23                    | 12  | 8   | 4   | 0,0008                                   | 0,0004 | 0,0003 | 0,0001 |
| (6;7>             | 204                  | 14                    | 19  | 4   | 6   | 0,0005                                   | 0,0006 | 0,0001 | 0,0002 |
| (7;8>             | 187                  | 14                    | 16  | 4   | 2   | 0,0005                                   | 0,0006 | 0,0001 | 0,0001 |
| (8;9>             | 177                  | 9                     | 15  | 5   | 2   | 0,0003                                   | 0,0006 | 0,0002 | 0,0001 |
| (9;10>            | 170                  | 11                    | 4   | 5   | 5   | 0,0004                                   | 0,0002 | 0,0002 | 0,0002 |
| (10;11>           | 184                  | 14                    | 6   | 1   | 1   | 0,0005                                   | 0,0002 | 0,0000 | 0,0000 |
| (11;12>           | 210                  | 17                    | 14  | 5   | 4   | 0,0005                                   | 0,0004 | 0,0002 | 0,0001 |
| (12;13>           | 197                  | 10                    | 10  | 4   | 6   | 0,0003                                   | 0,0003 | 0,0001 | 0,0002 |
| (13;14>           | 195                  | 11                    | 11  | 4   | 3   | 0,0004                                   | 0,0004 | 0,0001 | 0,0001 |
| (14;15>           | 213                  | 15                    | 16  | 4   | 3   | 0,0005                                   | 0,0005 | 0,0001 | 0,0001 |
| (15;16>           | 250                  | 12                    | 14  | 7   | 5   | 0,0003                                   | 0,0004 | 0,0002 | 0,0001 |
| (16;17>           | 239                  | 21                    | 12  | 4   | 4   | 0,0006                                   | 0,0003 | 0,0001 | 0,0001 |
| (17;18>           | 211                  | 11                    | 8   | 3   | 7   | 0,0003                                   | 0,0003 | 0,0001 | 0,0002 |
| (18;19>           | 219                  | 20                    | 8   | 7   | 2   | 0,0006                                   | 0,0002 | 0,0002 | 0,0001 |
| (19;20>           | 190                  | 18                    | 17  | 2   | 1   | 0,0006                                   | 0,0006 | 0,0001 | 0,0000 |
| (20;21>           | 164                  | 9                     | 9   | 1   | 6   | 0,0004                                   | 0,0004 | 0,0000 | 0,0002 |
| (21;22>           | 134                  | 9                     | 4   | 5   | 4   | 0,0004                                   | 0,0002 | 0,0002 | 0,0002 |
| (22;23>           | 94                   | 5                     | 4   | 0   | 1   | 0,0004                                   | 0,0003 | 0,0000 | 0,0001 |
| (23;24>           | 82                   | 10                    | 5   | 1   | 4   | 0,0008                                   | 0,0004 | 0,0001 | 0,0003 |
| (24;25>           | 39                   | 3                     | 1   | 1   | 0   | 0,0005                                   | 0,0002 | 0,0002 | 0,0000 |
| (25;26>           | 41                   | 3                     | 1   | 0   | 3   | 0,0005                                   | 0,0002 | 0,0000 | 0,0005 |
| Mean:             |                      |                       |     |     |     | 0,0008                                   | 0,0007 | 0,0002 | 0,0002 |

**Table S6.** Failure rate values depending on the daily temperature and the pipe diameter for the main network (300mm – 450mm).

| Temperature Range | $d_{(t_i; t_i+1)}$ | $nD_{(t_i; t_i+1)}$ |     |     |     | $\lambda D_{(t_i; t_i+1)}$               |         |         |         |
|-------------------|--------------------|---------------------|-----|-----|-----|------------------------------------------|---------|---------|---------|
|                   |                    | Pipe Diameter, mm   |     |     |     | Pipe Diameter, mm                        |         |         |         |
|                   |                    | 300                 | 350 | 400 | 450 | 300                                      | 350     | 400     | 450     |
| °C                | Number of Days     | Num. of Failures    |     |     |     | Num. of Failures/km · Day at Given Temp. |         |         |         |
| (−11;−10>         | 24                 | 0                   | 0   | 1   | 0   | 0,0000                                   | 0,0000  | 0,0061  | 0,0000  |
| (−10;−9>          | 27                 | 1                   | 0   | 2   | 0   | 0,0054                                   | 0,0000  | 0,0108  | 0,0000  |
| (−9;−8>           | 33                 | 0                   | 1   | 5   | 0   | 0,0000                                   | 0,0044  | 0,0220  | 0,0000  |
| (−8;−7>           | 42                 | 3                   | 2   | 5   | 0   | 0,0104                                   | 0,0069  | 0,0173  | 0,0000  |
| (−7;−6>           | 54                 | 2                   | 1   | 3   | 0   | 0,0054                                   | 0,0027  | 0,0081  | 0,0000  |
| (−6;−5>           | 53                 | 0                   | 2   | 7   | 0   | 0,0000                                   | 0,0055  | 0,0192  | 0,0000  |
| (−5;−4>           | 84                 | 1                   | 0   | 6   | 0   | 0,0017                                   | 0,0000  | 0,0104  | 0,0000  |
| (−4;−3>           | 70                 | 3                   | 0   | 8   | 0   | 0,0062                                   | 0,0000  | 0,0166  | 0,0000  |
| (−3;−2>           | 128                | 2                   | 1   | 13  | 0   | 0,0023                                   | 0,0011  | 0,0148  | 0,0000  |
| (−2;−1>           | 134                | 1                   | 2   | 9   | 0   | 0,0011                                   | 0,0022  | 0,0098  | 0,0000  |
| (−1;0>            | 168                | 1                   | 1   | 21  | 0   | 0,0009                                   | 0,0009  | 0,0182  | 0,0000  |
| (0;1>             | 204                | 1                   | 3   | 12  | 0   | 0,0007                                   | 0,0021  | 0,0086  | 0,0000  |
| (1;2>             | 176                | 3                   | 1   | 19  | 0   | 0,0025                                   | 0,0008  | 0,0157  | 0,0000  |
| (2;3>             | 208                | 2                   | 3   | 13  | 0   | 0,0014                                   | 0,0021  | 0,0091  | 0,0000  |
| (3;4>             | 189                | 2                   | 3   | 14  | 0   | 0,0015                                   | 0,0023  | 0,0108  | 0,0000  |
| (4;5>             | 219                | 1                   | 5   | 18  | 0   | 0,0007                                   | 0,0033  | 0,0120  | 0,0000  |
| (5;6>             | 187                | 4                   | 2   | 16  | 0   | 0,0031                                   | 0,0016  | 0,0124  | 0,0000  |
| (6;7>             | 204                | 3                   | 6   | 16  | 0   | 0,0021                                   | 0,0043  | 0,0114  | 0,0000  |
| (7;8>             | 187                | 4                   | 0   | 14  | 0   | 0,0031                                   | 0,0000  | 0,0109  | 0,0000  |
| (8;9>             | 177                | 2                   | 2   | 14  | 0   | 0,0016                                   | 0,0016  | 0,0115  | 0,0000  |
| (9;10>            | 170                | 3                   | 1   | 15  | 0   | 0,0026                                   | 0,0009  | 0,0128  | 0,0000  |
| (10;11>           | 184                | 1                   | 0   | 10  | 0   | 0,0008                                   | 0,0000  | 0,0079  | 0,0000  |
| (11;12>           | 210                | 0                   | 3   | 13  | 0   | 0,0000                                   | 0,0021  | 0,0090  | 0,0000  |
| (12;13>           | 197                | 2                   | 3   | 7   | 0   | 0,0015                                   | 0,0022  | 0,0052  | 0,0000  |
| (13;14>           | 195                | 1                   | 3   | 10  | 0   | 0,0007                                   | 0,0022  | 0,0075  | 0,0000  |
| (14;15>           | 213                | 1                   | 1   | 7   | 1   | 0,0007                                   | 0,0007  | 0,0048  | 0,0007  |
| (15;16>           | 250                | 4                   | 1   | 6   | 0   | 0,0023                                   | 0,0006  | 0,0035  | 0,0000  |
| (16;17>           | 239                | 1                   | 2   | 10  | 0   | 0,0006                                   | 0,0012  | 0,0061  | 0,0000  |
| (17;18>           | 211                | 3                   | 1   | 12  | 0   | 0,0021                                   | 0,0007  | 0,0083  | 0,0000  |
| (18;19>           | 219                | 1                   | 0   | 15  | 0   | 0,0007                                   | 0,0000  | 0,0100  | 0,0000  |
| (19;20>           | 190                | 1                   | 1   | 3   | 0   | 0,0008                                   | 0,0008  | 0,0023  | 0,0000  |
| (20;21>           | 164                | 0                   | 1   | 7   | 0   | 0,0000                                   | 0,0009  | 0,0062  | 0,0000  |
| (21;22>           | 134                | 1                   | 0   | 6   | 0   | 0,0011                                   | 0,0000  | 0,0065  | 0,0000  |
| (22;23>           | 94                 | 0                   | 0   | 2   | 0   | 0,0000                                   | 0,0000  | 0,0031  | 0,0000  |
| (23;24>           | 82                 | 0                   | 0   | 7   | 0   | 0,0000                                   | 0,0000  | 0,0124  | 0,0000  |
| (24;25>           | 39                 | 0                   | 0   | 3   | 0   | 0,0000                                   | 0,0000  | 0,0112  | 0,0000  |
| (25;26>           | 41                 | 0                   | 0   | 2   | 0   | 0,0000                                   | 0,0000  | 0,0071  | 0,0000  |
| Mean:             |                    |                     |     |     |     | 0,00173                                  | 0,00146 | 0,01025 | 0,00002 |

**Table S7.** Failure rate values depending on the daily temperature and the pipe diameter for the main network (500mm – 1200mm).

| Temperature Range | $d_{(t_i; t_i+1)}$ | $nD_{(t_i; t_i+1)}$ |     |     |      | $\lambda D_{(t_i; t_i+1)}$               |         |         |         |
|-------------------|--------------------|---------------------|-----|-----|------|------------------------------------------|---------|---------|---------|
|                   |                    | Pipe Diameter, mm   |     |     |      | Pipe Diameter, mm                        |         |         |         |
|                   |                    | 500                 | 600 | 800 | 1200 | 500                                      | 600     | 800     | 1200    |
| °C                | Number of Days     | Num. of Failures    |     |     |      | Num. of Failures/km · Day at Given Temp. |         |         |         |
| (−11;−10>         | 24                 | 0                   | 0   | 0   | 0    | 0,0000                                   | 0,0000  | 0,0000  | 0,0000  |
| (−10;−9>          | 27                 | 0                   | 0   | 0   | 0    | 0,0000                                   | 0,0000  | 0,0000  | 0,0000  |
| (−9;−8>           | 33                 | 0                   | 0   | 0   | 0    | 0,0000                                   | 0,0000  | 0,0000  | 0,0000  |
| (−8;−7>           | 42                 | 1                   | 0   | 0   | 0    | 0,0035                                   | 0,0000  | 0,0000  | 0,0000  |
| (−7;−6>           | 54                 | 0                   | 0   | 0   | 0    | 0,0000                                   | 0,0000  | 0,0000  | 0,0000  |
| (−6;−5>           | 53                 | 0                   | 0   | 0   | 0    | 0,0000                                   | 0,0000  | 0,0000  | 0,0000  |
| (−5;−4>           | 84                 | 4                   | 0   | 0   | 0    | 0,0069                                   | 0,0000  | 0,0000  | 0,0000  |
| (−4;−3>           | 70                 | 0                   | 0   | 0   | 0    | 0,0000                                   | 0,0000  | 0,0000  | 0,0000  |
| (−3;−2>           | 128                | 1                   | 0   | 0   | 0    | 0,0011                                   | 0,0000  | 0,0000  | 0,0000  |
| (−2;−1>           | 134                | 1                   | 0   | 0   | 0    | 0,0011                                   | 0,0000  | 0,0000  | 0,0000  |
| (−1;0>            | 168                | 0                   | 1   | 0   | 0    | 0,0000                                   | 0,0009  | 0,0000  | 0,0000  |
| (0;1>             | 204                | 1                   | 0   | 1   | 0    | 0,0007                                   | 0,0000  | 0,0007  | 0,0000  |
| (1;2>             | 176                | 2                   | 0   | 0   | 0    | 0,0017                                   | 0,0000  | 0,0000  | 0,0000  |
| (2;3>             | 208                | 0                   | 0   | 0   | 0    | 0,0000                                   | 0,0000  | 0,0000  | 0,0000  |
| (3;4>             | 189                | 3                   | 0   | 0   | 0    | 0,0023                                   | 0,0000  | 0,0000  | 0,0000  |
| (4;5>             | 219                | 0                   | 0   | 0   | 0    | 0,0000                                   | 0,0000  | 0,0000  | 0,0000  |
| (5;6>             | 187                | 0                   | 0   | 1   | 1    | 0,0000                                   | 0,0000  | 0,0008  | 0,0008  |
| (6;7>             | 204                | 0                   | 0   | 0   | 0    | 0,0000                                   | 0,0000  | 0,0000  | 0,0000  |
| (7;8>             | 187                | 0                   | 0   | 0   | 0    | 0,0000                                   | 0,0000  | 0,0000  | 0,0000  |
| (8;9>             | 177                | 0                   | 0   | 0   | 0    | 0,0000                                   | 0,0000  | 0,0000  | 0,0000  |
| (9;10>            | 170                | 1                   | 0   | 0   | 0    | 0,0009                                   | 0,0000  | 0,0000  | 0,0000  |
| (10;11>           | 184                | 2                   | 0   | 0   | 0    | 0,0016                                   | 0,0000  | 0,0000  | 0,0000  |
| (11;12>           | 210                | 1                   | 1   | 0   | 0    | 0,0007                                   | 0,0007  | 0,0000  | 0,0000  |
| (12;13>           | 197                | 1                   | 0   | 0   | 0    | 0,0007                                   | 0,0000  | 0,0000  | 0,0000  |
| (13;14>           | 195                | 4                   | 0   | 0   | 0    | 0,0030                                   | 0,0000  | 0,0000  | 0,0000  |
| (14;15>           | 213                | 2                   | 0   | 1   | 0    | 0,0014                                   | 0,0000  | 0,0007  | 0,0000  |
| (15;16>           | 250                | 3                   | 0   | 0   | 0    | 0,0017                                   | 0,0000  | 0,0000  | 0,0000  |
| (16;17>           | 239                | 4                   | 0   | 0   | 0    | 0,0024                                   | 0,0000  | 0,0000  | 0,0000  |
| (17;18>           | 211                | 1                   | 0   | 0   | 0    | 0,0007                                   | 0,0000  | 0,0000  | 0,0000  |
| (18;19>           | 219                | 2                   | 0   | 0   | 0    | 0,0013                                   | 0,0000  | 0,0000  | 0,0000  |
| (19;20>           | 190                | 1                   | 1   | 0   | 0    | 0,0008                                   | 0,0008  | 0,0000  | 0,0000  |
| (20;21>           | 164                | 2                   | 0   | 0   | 0    | 0,0018                                   | 0,0000  | 0,0000  | 0,0000  |
| (21;22>           | 134                | 0                   | 0   | 0   | 0    | 0,0000                                   | 0,0000  | 0,0000  | 0,0000  |
| (22;23>           | 94                 | 0                   | 0   | 0   | 0    | 0,0000                                   | 0,0000  | 0,0000  | 0,0000  |
| (23;24>           | 82                 | 1                   | 0   | 0   | 0    | 0,0018                                   | 0,0000  | 0,0000  | 0,0000  |
| (24;25>           | 39                 | 3                   | 0   | 0   | 0    | 0,0112                                   | 0,0000  | 0,0000  | 0,0000  |
| (25;26>           | 41                 | 3                   | 0   | 0   | 0    | 0,0106                                   | 0,0000  | 0,0000  | 0,0000  |
| Mean:             |                    |                     |     |     |      | 0,00156                                  | 0,00006 | 0,00006 | 0,00002 |
